# Supplementary material for: Overexpression of PagSTOMAGEN, a Positive Regulator of Stomatal Density, Promotes Vegetative Growth in Poplar
Source: MDPI journal article supplement (doi:10.3390/ijms231710165), 2022-09-05
Supplement: s1 [file s1]

## Supplemental Data

The following supplemental materials are available:

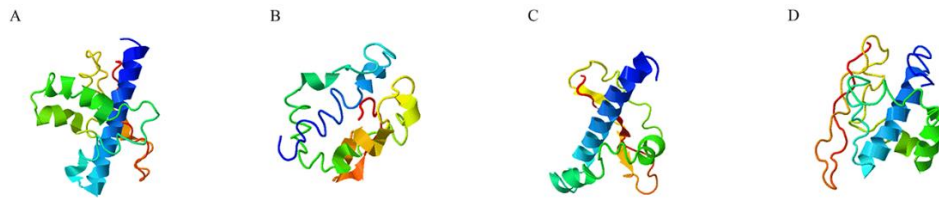

**Supplemental Figure S1.** 3D structure diagram of *PagSTOMAGEN* (A), *PtrSTOMAGEN* (B), *AtSTOMAGEN* (C), and *OsSTOMAGEN* (D). Prediction of 3D structures was done on the I-TASSER server.

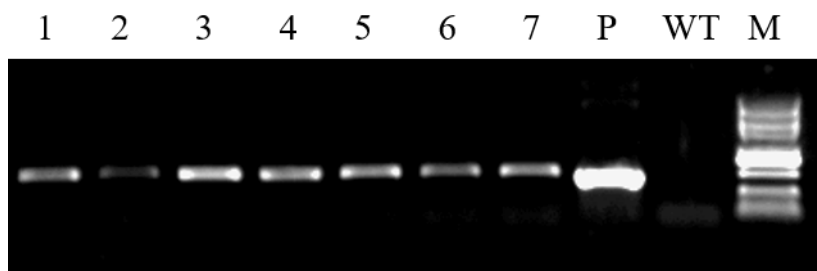

**Supplemental Figure S2.** Identification of transgenic poplar. P means positive control. WT means wild-type poplar. M means maker.

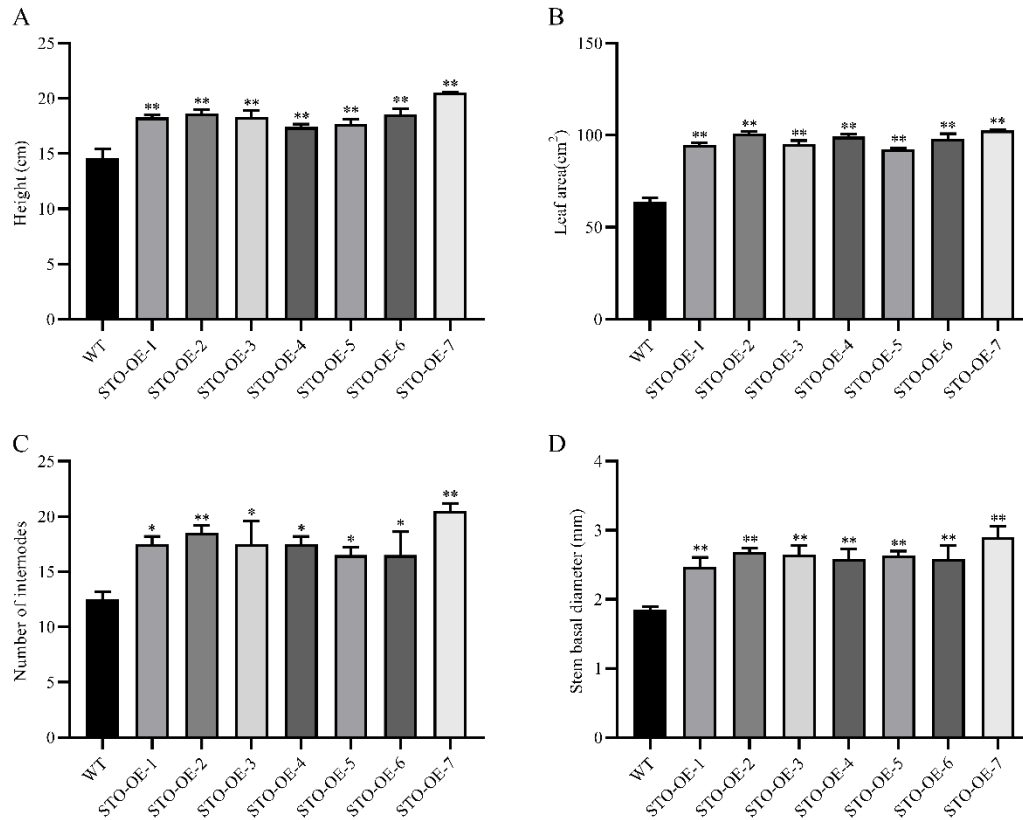

**Supplemental Figure S3.** Phenotypic measurements of *PagSTOMAGEN*-overexpressing (STO-OE) and wild-type (WT) lines.

(A) Statistical analysis of plant height of STO-OE and WT lines. (B) Statistical analysis of leaf area of STO-OE and WT lines. (C) Statistical analysis of the number of internodes of STO-OE and WT lines. (D) Statistical analysis of the stem basal diameter of STO-OE and WT lines. Data are presented as the mean  $\pm$  SD. One-way ANOVA were used to determine variance among the mean values; \*\*,  $P < 0.01$ ; \*,  $P < 0.05$ .

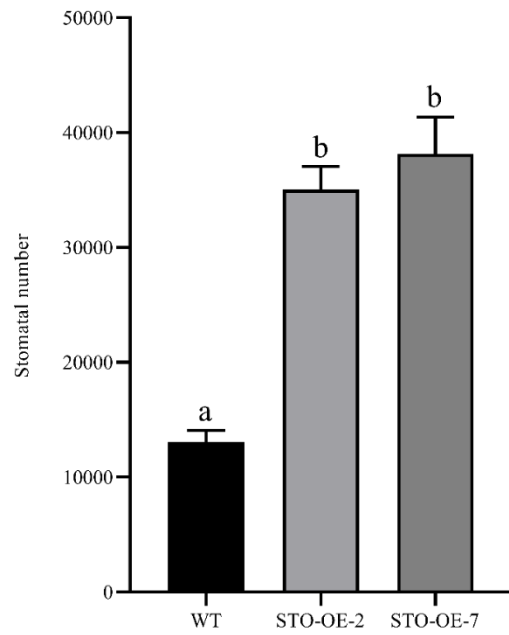

**Supplemental Figure S4.** Stomatal number of STO-OE and WT lines. Stomatal number = leaf area  $\times$  stomatal density. Error bars represent the SD for each genotype with five plants.  $P < 0.05$  was considered statistically significant and was represented by different letters.

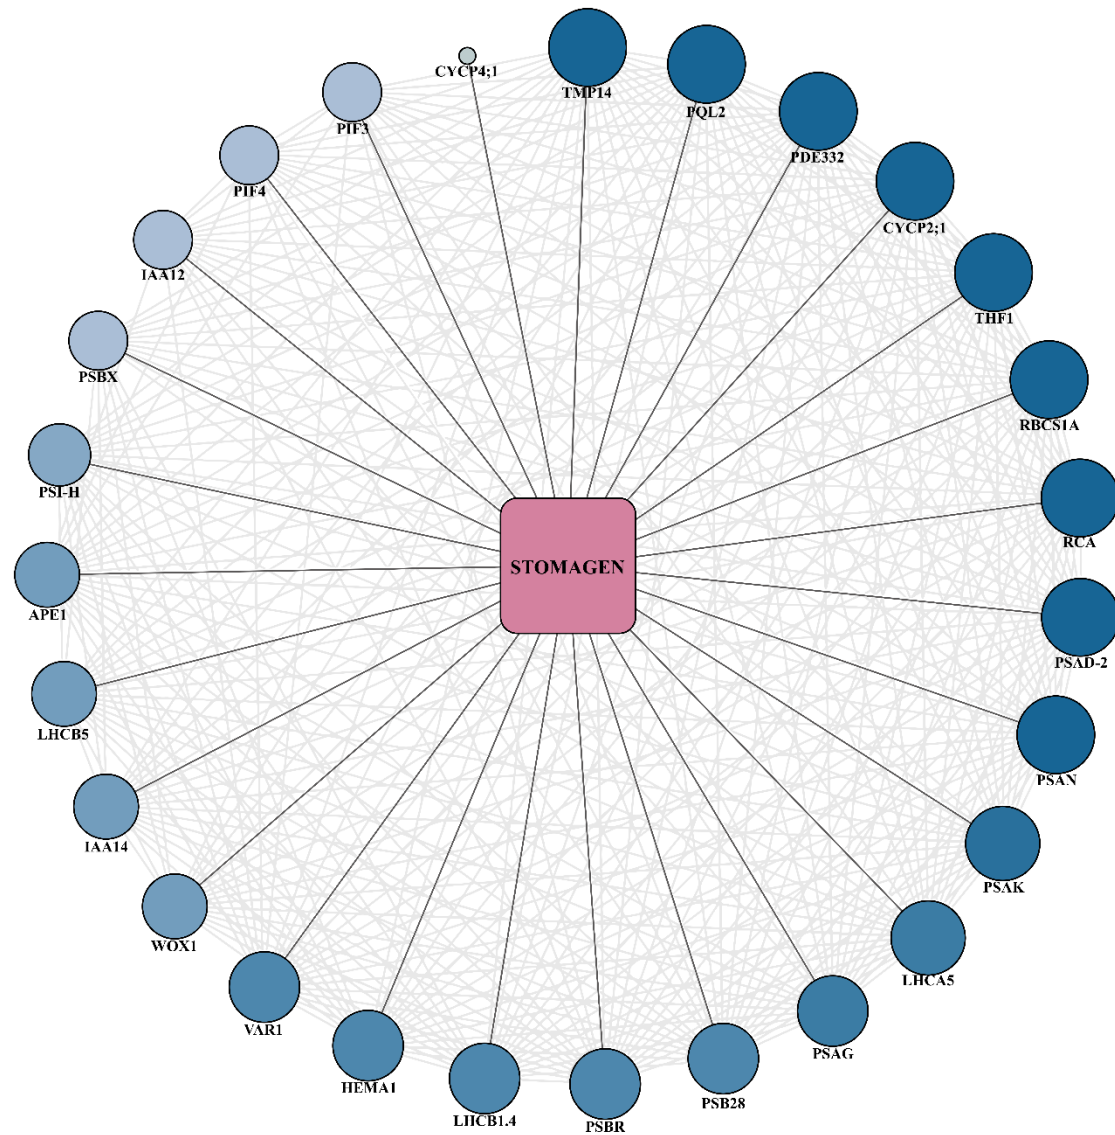

**Supplemental Figure S5.** Co-expression network centered on STOMAGEN.

Blue circle nodes represent photosynthesis and growth-related genes. The node size is positively correlated with the gene degree.

**Supplemental Table S1.** Primers used for this research.

| Primer ID          | Primer Sequence (5'→3')              | Purpose                                              |
|--------------------|--------------------------------------|------------------------------------------------------|
| PagSTO-1F          | ATGGCAAACACTAGACTATG                 | Cloning PagSTOMAGEN coding region                    |
| PagSTO-378R        | TCACCTATGACAAATACATT                 | Cloning PagSTOMAGEN coding region                    |
| PagSTO-Q-13F       | AGACTATGCTACTTACTATCCCTT<br>C        | qPCR of PagSTOMAGEN                                  |
| PagSTO-Q-120R      | AGAAGATAAGGTGGTCAGCG                 | qPCR of PagSTOMAGEN                                  |
| ACTIN-Q-F          | AAACTGTAATGGTCCTCCCTCCG              | qPCR of ACTIN                                        |
| ACTIN-Q-R          | GCATCATCACAATCACTCTCCGA              | qPCR of ACTIN                                        |
| PBI121-PagSTO-1F   | CGGGGGACTCTAATGGCAAACAC<br>TAGACTATG | Cloning PagSTOMAGEN coding region into PBI121 vector |
| PBI121-PagSTO-375R | ACTAGTCAGTCGACTCCTATGAC<br>AAATACATT | Cloning PagSTOMAGEN coding region into PBI121 vector |
| PagSDD1-Q-F        | ACATAATTGCAGCCTGGCCT                 | qPCR of PagSDD1                                      |
| PagSDD1-Q-R        | ATGAGCTGAGCGGATGAGTG                 | qPCR of PagSDD1                                      |
| PagTMM-Q-F         | AATCCGATGGGGTCTGCTAC                 | qPCR of PagTMM                                       |
| PagTMM-Q-R         | GCCTAGTGACTCGGGGATTG                 | qPCR of PagTMM                                       |
| PagERECTA-Q-F      | GGCATTTTCGTTTGGAACTTGTCT             | qPCR of PagERECTA                                    |
| PagERECTA-Q-R      | AGACGATGGGGAGTCTGTCC                 | qPCR of PagERECTA                                    |
| PagEFP1-Q-F        | TGTCTTCCGACGGCCATTTC                 | qPCR of PagEFP1                                      |
| PagEPF1-Q-R        | GCTGGCCATCTCTCCCTGTA                 | qPCR of PagEFP1                                      |
| PagEPF2-Q-F        | GAAGTTCTTAGTTGGAGCCCACA              | qPCR of PagEFP2                                      |
| PagEPF2-Q-R        | CTTGGGGAAATCATGAGCTTCTT              | qPCR of PagEFP2                                      |
| PagSPEECHLESS-Q-F  | GGCGGTCAGTGTCACAAAAG                 | qPCR of PagSPEECHLESS                                |
| PagSPEECHLESS-Q-R  | AGACATACGTTGCTGCCCAT                 | qPCR of PagSPEECHLESS                                |
| PagMUTE-Q-F        | TAGGGCGCCACTGCAATTA                  | qPCR of PagMUTE                                      |
| PagMUTE-Q-R        | TCGCCGCGATATCACTTTCA                 | qPCR of PagMUTE                                      |
| PagFAMA-Q-F        | GCCTAGAATCCCAGAAGCGG                 | qPCR of PagFAMA                                      |
| PagFAMA-Q-R        | CTCAGCGGTTTCTTCACGGA                 | qPCR of PagFAMA                                      |

**Supplemental Table S2.** Amino acid sequences of the EPF/EPFL family.

>AtEPFL7

MDHVNPTLFHLKSLSFITLTLTYISSPHFLLFKTLSMYENLRIFLKIIPFNLFGMKSV  
SLIAILLHLFVSSDTFQLDLF

HCKYYLAITWLINRDNECVIYILVGSFICCIVICEVVDKASGSSIPDCSNACGPCKP  
CKLVVISSTCSASEACPLVYKCL  
CKGKYYHVPSLT  
>AtEPFL8  
MDSSRKYKRCGFGAALFVANIFFSLLSLHCISGAHGHQQRMKESVMGSEPPVC  
ATKCRNCKPCLPYLFDIRGAHDDDDDS  
EPYYPVKWICRCRDRVFEP  
>AtEPFL6  
MGFERTSSSL SLLSSSLPSSLQPSENTRAKFSLFYLLLLFFVLCVIATFTITPTSTSSPY  
NRNSNSGTLGNFYAKVRKLF  
IPLTLLRDLTISDCDGMSRLTGHAEMPCTPKEILSRRIGFSAHEDKDSTQLLVRSP  
LVGPCLAYDLDRVEEGKSTVVIKK  
TRKIGDRSKEAELRRILRGLGSSPPRCSSKCGRCTPCKPVHVPVPPGTPVTAEYYP  
EAWRCKCGNKLYMP  
>AtEPFL3  
MRVKETGKGFVVILMVMIPIVSWVDATSRPIASSHVSFYPEIIPQAAEENSRRRI  
LNPENENKEEIVKRRRRRIGSKPPSC  
EKKCYGCEPCEAIQFPTISSIPHLSPHYANYQPEGWRCHCPPP  
>AtEPFL5  
MGVVLPTLIVYAFLLFFSSSSAASLQRPSGGLGQGKKEIARSGLPQIVDQKRLG  
GPGSVPPMCRLKCGKCEPCKAVHVP  
IQPGLIMPLEYYPEAWRCKCGNKLFMP  
>AtEPFL9/STOMAGEN  
MKHEMMNIKPRCITIFLLFALLLGNYVVQASRPRSIENTVSLLPQVHLLNSRRR  
HMIGSTAPTCTYNECRGCRYKCRAE  
QVPVEGNDPINSAYHYRCVCHR  
>AtEPFL4  
MGTFRRRRRFLAALVTFALLHLFSASSIVSADGRWIGQRTGSDLPGGFIRSNKR  
FGGPGSSPPTCRSKCGKCQPCPKPVH  
VPIQPGLSMPLYYPEAWRCKCGNKLFMP  
>AtEPFL2  
MVWSSNMSSFL LILLILNSTHFSLMANGRPEPDSVEFTKSGDQDVKMMMRGLIG  
SRPPRCERVRCRSCGHCEAIQVPTNP  
QTKLHSPLTTSSSSSETIHLDYTRGDDSTNYKPM SWKCKCGNSIYNP  
>AtEPFL1  
MFAIYKSTLLLPLILILLITPQVSSFLQPIQPPISPQVALIEDKARLGSTPPSCHNRC  
NNCHPCMAIQVPTLPTRSRFT  
RVNPFSGGFVRPPSSLTTVLDQYSNYKPMGWKCHCNGHFYNP  
>AtEPF2  
MTKFVRKYMFCVLVFAACSLVVNSIRTPPLKNTVNGGEKKNADIEQAQTHHK  
KEISKNGGVEMEMYPTGSSLPDCSYAC  
GACSPCKRVMISFECSVAESCSVIYRCTCRGRYYHVPSRA  
>AtEPF1

MKSLLLLAFFLSFFFGSLLARHLPTSSHPSHHHVGMTGALKRQRRRPDTVQVAG  
SRLPDCSHACGSCSPCRLVMVSFVCA  
SVEEAETCPMAYKCMCNKSYVPV  
>PagEPFL7  
AMKHPLFYVLAIFVAAALIIPMTMSAVRVSRHSSRERYTTWPRKRNSTVGRLTL  
TSKGVARERMKQNGAHPLQIAGSRLPDCSHACGSCTPCVLKIVSSPCSSLAQSE  
ACPISYKCMCNKYYPVP\*  
>PagEPFL10  
AMKHPLFYVLAIFVAAALIIPMTMSAVRISRHSSRERYTTWPRKRNSTVGRLTL  
TSKGVARERMKQNGAHPLQIAGSRLPDCSHACGSCTPCVLKIVSSPCSSLAQSE  
ACPISYKCMCNKYYPVP\*  
>PagEPFL1  
MKVFVAASVIALFLLPMAISARHIGRPRTHHGHGHSTQPRIKDGTVAKPKFLY  
GERWPAKRRGADTVQIAGSSLPDCSHACGSCSPCRLVMVSFVCASLEEAETCP  
MAYKCMCNKSYVPV\*  
>PagEPF1  
SLLKEKSNTTPLKLTAMKIFVAALVIALICLPTAISARHIGRPRTHHGHGHSTQ  
PRIKDGTVAQPNFYRERWPAKRRGDTVQIAGSSLPDCSHACGSCSPCRLVMVSF  
ICASLEEAETCPMAYKCMCHNKSYPVP\*  
>PagEPFL2  
MKFLVGAHKSLLLMLIFMVMFMVGKSLRPHHYTKSSYSKEGASNGEEAHDFPKE  
AAREELGMELYPTGSSLPDCSHACGPCTPCKRVMVSFKCSVAESCPIVYRCMCK  
GKYYHVPSA\*  
>PagEPF2  
MKFLVGAHKSLLVMLIFMVMFMVGKSLRPHHYTSPATQRRSVQMGMRISPKGS  
RRRARNGTISAIISLPTALMPVDLALHARGCMCKGKYYHVPSA\*  
>PagEPFL4  
MGSCHLLPASRSLTTAISYFLLYPVSCFDQHLQPPTSPHKGIAFEGKARLGSTPP  
SCRSKCNGCHPCIAVQVPALPSQNQPVQVGS AKRTRSVDEFFDSYPAGNRFPDY  
RPLGWKCRCADHFYNPLT\*  
>PagEPFL5  
MGSCLLLPASRSLTTAISYFLLYPVSCFDQHLQPPTSPHKGIAFEGKARLGSTPP  
SCHSKCNGCHPCIAVQVPALPGQNQPVRVGS AKRTRSVDEFFDSYPAGNRFPD  
YRPLGWKCRCADHFYNPLT\*  
>PagEPFL6  
MATASCATLLHFLSTVFCFAQHDLQPPIASHEGAAFEKARLGSTPPSCHNK  
CNGCHPCMAVQVPTLPNPNRPAQPVSTKTSIIDPFFDPYPAGNNRTVSIENPEC  
TKNMPEKLKTINIFIKLVASWQCKIYSICLCLT\*  
>PagEPFL3  
MGS AKIGFSCHRNRQLIISLLFILVSSSTLVRFTAEGRATTKLLEAAPEKGVEEKI  
AVRAQTIGSRPPRCDKRCTSCEHCEAVQVPITTQAHSRKRSRFSAAISNIAYS RG  
DGISNYKPMMSWKCKCGNLIFNP\*  
>PagEPFL11

MEAGSICCLVLALHTVSLVSAASRPFAPNNGVAVNQAVTGHSLSLQVPLDSN  
FDPQSGSEKGIKTKDGVAGGMIEAAAEVTLKALQKLGPVHVCTSSAMAALL  
VKQFKCPPSAKPAPTI\*

>PagEPFL12

MTLLRHRHHFLSTLTFFTFLLFLSAPATTLSQLGSGVLQQGGEGRGKGGGLRAF  
QRVLTQKRLGGPGSSPPSCRSKCGKCSCKAVHVAIQPGLSMPLEYYPEAWRCK  
CGNELFMP\*

>PagEPFL13

MSLLRPRHHLSTLTAFTFLLFFSASATTVLLSQPGSGSLQEGGEDKQKQSGLGAF  
PRVLTQKRHGGPGSSPPSCRSKCDKCSCEPVHVPIQRGWRMPLEYYPEAWRC  
KCGNKLMP\*

>PagEPFL14

MECLKRKRSLIFNNKPSLFHYVSFTIFFFFVSFVALFSPFTSNTTCLGMRCPLSEKA  
DNFYFQEFKTRSGYDEQVEVSSSMARRFLSGPGSSPPRCTSKCGNCTPCKPVHV  
AMPPGTPVTTEYPEAWRCKCGNKLYMP\*

>PagEPFL15

MELKSKRSLIFFNKEPSLFQCVSFTIFFILSFVALFSTISSKTTCLGIIRCPLSGKARDF  
YFQEFKTRGYEGQMEASLSMARRFLSGPGSSPPRCTSKCGKCTPCKPVHVPVP  
GTPVTAEYPEAWRCKCGNKLYMP\*

>PagEPFL8

MASATDSSHGIRVTFIVILFSLTFLPPVSVGSSTPSRGSEDMKQKKMVLGSRPPQ  
CVNRC SNCKPCMAALVTPPHHKNGVRGPSSSKGDESYYLLSWKCKCGDKYFQ  
P\*

>PagEPFL9

MANTRLCYLLSLLFTFILAATAIFSFLGCRENTLTTLSSSFDPEIKSCCLIIKVSFH  
HHRKDSQALGGNEEQMSSKRLMIGSTAPTCTYNECRGCKYKCRAEQVPVEGN  
DPIHSAYHYKCIHR\*XXXXXXXXXXXXXXXXXX

>OsEPF1

MWHVPSRPESPAFNLCPHFVHYVRTTFLCIRNAAGVQGSAGGLHNGGTAPSA  
AAANGSTTTAYDDRGTGGQTATFQVQQGAQPEEETTTEMGNAAEAATGSRLP  
DCTHACGPCSPCRRVMVSLRCAEAAESCPVAYRCMCRGRFFRVPTL\*

>OsEPF2

MRRHATLADARGHHRILLILAVVLLAATGDGIRSPPYDVVTPVHGAQDEKISA  
TATLVISPQQATAGDNVGRGVLQEEVRATGSSLPDCSHACGACSPCNRMVVSF  
KCSIAEPCPMVYRCMCKGKCYVPVPSS\*

>OsEPFL1

MRTAATPPLAAAAA VAAVFLSALLLASASASASRLPPRRLLPLVGGEVAVA  
VVAGEEEKVRLGSSPPSCYSKCYGCSPCVAVQVPTLSAPSVPAAPRTTPRRS  
WRRSPTTSR\*

>OsEPFL2

MAVRSPHRAFLVAMILVSFLLGAAAGIRSTTLSSSQSLAEDKSRLGSTPPSCHNR  
CNACNPCTPVQVAALPGVSRPASAADRV DVAGFAQYSNYKPLGWKCRCAGR  
LFDP\*

>OsEPFL3



ISLNSDAAITSAAGGELHHHQIKEPPPETGGKGWAAMSEALIGSRPPRCEGK  
CAPCGRCEAVQVPVAPRAGRRLRAFFFSRAAADDDDESSTNYKPLNWKCRCA  
DTRRALDP\*

>OsEPFL4

TGGRTTTTTTGRDGCWLVPFFASSHPVATQLLPPKSSSKWRAICSCSSCSLSS  
PPPSLPKLPPASPRSEKGVAGIRGVIGSRPPSCEGRSCRSCGHCEAVQVPITPQQLO  
KKRGQGDDRRRKKKQLLGHGDRAAAGGRAMPDSDYDDHSNYKPLSWRCKC  
GGMILNP\*

>OsEPFL5

MVHLLPCTHAHLPLPLFFSILLLIFSMEVAHSDARRRLPLKLLEVGNIEKEEPDETIG  
EKMOMEMEGRRRLIGSRPPRCERVCMSCGHCEAVQVPVQVIQKTQTKAAAAA  
AAEQEQHVVSATAISA AVFTYRVNGLSNYKPLSWKCKCGGIILDP\*

>OsEPFL6

MASARRGRRRRVPVAASPLLLLVFLAASLGACSSARKRSGDGGGAVAEVYY  
SSWGS AVAVAGRRRLVGPSSPPTCRSRGCGCHPCRPHVAIQPGRSFPLEYYP  
EAWRCKCGDKLFMP\*

>OsEPFL7

MHATVAAAARRPIRVLRRPAAAAAHVRRRLDSSSLMLARRTNAAAGGGDNG  
DVRRRRLIGPSSPPTCRARCGRCAPCRPHVAIQPGVGAQWEYYPEVWRCKC  
GDKLFMP\*

>OsEPFL8

MMPACGMGSSRRPRRWSGGSKLAVACLA AVAVTSLQLCCLSGCFIAACGGAG  
RDDDDVRRYSDHFGRLEGAGAHSGDLLEGGGHYHVGLGRRLLSGGPGSHPPR  
CTSKCGSCSPSPVHVSPPGVLTTEYYPEAWRCKCRNRLYMP\*

>OsEPFL10

MASSGGRWRRSGSSMLKL VVALCFFAV AISLCCVCLSSGCGGSGCGGFRRRAVL  
LRLGNEIQRAASFCA LDHSSSGRRWRLLAEGPGSYPPRCTAKCGACVPCYPVH  
VAVPPGVPVTTEYYPEAWRCKCGNRLYMP\*

>OsEPFL9

MANACPTSTTSSLPLFFLFCLLFSHARC�QGHGSGISGTDYGEQYPHQTLPEEH  
IHLQENIKVLNKERLPKYARRMLIGSTAPICTYNECRGCRFKCTAEQVPVDAND  
PMNSAYHYKCVCHR\*

>PtEPFL7

MSRHFINYRTNRILTHGNIILYRGTDQAQAIQCGRRIHVRTLGSFWSLNNFTKL  
NPRAMKHPLFYVLAIFVAAALIPLMTMSAVRISRHSNRERYTTWPRKRNSTMG  
RLTLTSKGVVRERMKQNGAHPLQIAGSRLPDCSHACGSCTPCVLKIVSSLCSSLA  
QSEACPISYKCMCKNKYYPVP\*

>PtEPFL1

MRKTKAMKIFVAALVIALCLLPMAISARHIGRPRTHHGHHSSTQPRIKDGTVA  
KPNFLYRERWPEKRRGADTVQIAGSSLPDCSHACGS CSPCLVMVSFICASLEEA  
ETCPMAYKCMCDNKSYPVP\*

>PtEPF1

MKIFVATLVIALICLPTAISARHIGRPRTHHGHHHSTQPRIKDGTVAQPNFYRER  
WPAKRRGDTVQIAGSSLPDCSHACGSCSPCRLVMVSFICASLEEAETCPMAYKC  
MCHNKSYPVP\*

>PtEPF2

MKFLVGAHKSLLLMLIFMVMVVGKSLRPHHYTKSSYSKEGASNGDEAHDFPKE  
AAREELGMELYPTGSSLPDCSHACGPCTPCKRVMVSFKCSVAESCPIVYRCMCK  
GKYYHVPSA\*

>PtEPFL4

MGSCRLLPASRSLVLTTAISIYFLLYPVSCFDQHLQPPTSPRKGIAFEELKARLGSTP  
PSCHNKCNGCHPCIAVQVPALPSQNEPVQMGSACTSSIDEFFDSYPAGNRFPDY  
RPLGWKCRCADHFYNPLT\*

>PtEPFL5

MGSYHQCFLSATVLLHILLSTVFCFAQHDLQPPIASHEGAAFEELKARLGSTPPS  
CHNKCNGCHPCMAVQVPTLPNQNRPAQPVSTKTSIIDPFFDPYPAGNNRYSNY  
KPLGWKCRCGDHFYNPLS\*

>PtEPFL3

MGSAKIGFSCHRNRLIISLLFILVSSSTLVRFTAEGRVTTKLLEAAPEKGVEEEKI  
AVRARTIGSRPPRCDKRCNSCEHCEAVQVPITTQAHSRKRSRFSAAISNIAYSRG  
DGISNYKPMSSWKCKCGNLIFNP\*

>PtEPFL6

MEASSICCLVLALQIVSLVSAASRPFAPNSGVAVNRAVTGHSLQSLQVPLDSNF  
DPQSGSEKGIKTKDGVAGGMIEAAAGYAKGITKIGSTPPSCEHKCHGCTPCEAI  
QVPAISKGTGTHLSVNYANYEPEGWKCKCGPSFYSP\*

>PtEPFL8

MTLLRHRHHFLSTLTFFTFLFLSAPATTLSQLGSGVLQQGGEERGKGGGLRAF  
QRVLTQKRLGGPGSSPPSCRSKCGKCSCKAVHVAIQPGLSMPLEYYPEAWRCK  
CGNELFMP\*

>PtEPFL10

MSLLRPRHHLSTLTAFTFLVFFSASATTVLLSQLGSGSLQEGGEDKGKGSGLGAF  
PRVLTQKRHGGPGSSPPSCRSKCDKCSCEPVHVPIQHGWRMPLEYYPEAWRC  
KCGNKL FMP\*

>PtEPFL11

MECLKRKRSLIFNNKPSLFHYVSFTIFFFSLFVALFSPFTSNTTCLGIRCPLSEKAD  
HFYFQEFETRGRYDEQMEVSSSMARRFLSGPGSSPPRCTSKCGNCTPCKPVHVA  
MPPGTPVTTEYYPEAWRCKCGNKLYMP\*

>PtEPFL12

MELKSKRSLIFFNKEPSLFQCVSFTIFFFSLFVALFSTISSKTTCLGIIRCPLSGKARN  
FYFQEFETRGRYGDPMESLSMARRFLSGPGSSPPRCTSKCGKCTPCKPVHVVPV  
PGTPVTAEYYPEAWRCKCGNKLYMP\*

>PtEPFL2

MASATDSSYGIRITFIVILFFSLTFLPPVSAGSSMPSRGSEDMKQKKMVLGSRPPQC  
VNRC SNCKPCMAALVTPPHKNGVRGPSSSKGDESYLLSWKCKCGDKYFQP\*

>PtEPFL9

MANTRLCYLLSLLFTFILAAFVIQGSRNQELLPYHQSI<sup>ST</sup>PSQEDSQALGGNEEQ  
MSSKRLMIGSTAPTCTYNECRGCKYKCRAEQVPVEGNDPIHSAYHYKCICHR\*

**Supplemental Table S3.** DEGs in STO-OE and WT poplars.

**Supplemental Table S4.** The number of DEGs in STO-OE and WT poplars.

**Supplemental Table S5.** GO terms of DEGs between STO-OE and WT lines in the 1<sup>st</sup> leaf position.

**Supplemental Table S6.** GO terms of DEGs between STO-OE and WT lines in the 5<sup>th</sup> leaf position.

**Supplemental Table S7.** GO terms of DEGs between STO-OE and WT lines in the 10<sup>th</sup> leaf position.

**Supplemental Table S8.** GO terms of DEGs between STO-OE and WT lines in young stem segments.

**Supplemental Table S9.** DEGs involved in the photosynthesis and growth in the 1<sup>st</sup> leaf position.

**Supplemental Table S10.** DEGs involved in the photosynthesis and growth in the 5<sup>th</sup> leaf position.

**Supplemental Table S11.** DEGs involved in the photosynthesis and growth in the 10<sup>th</sup> leaf position.

**Supplemental Table S12.** DEGs involved in the photosynthesis and growth in

young stem segments.
